# Supplementary material
Source: publisher site journal article supplement (http://e-cmh.org/upload/media/cmh-2023-0076-Supplementary-Fig-3.pdf)
Supplement: Supplementary file 1 [file cmh-2023-0076-Supplementary-Fig-3.pdf]

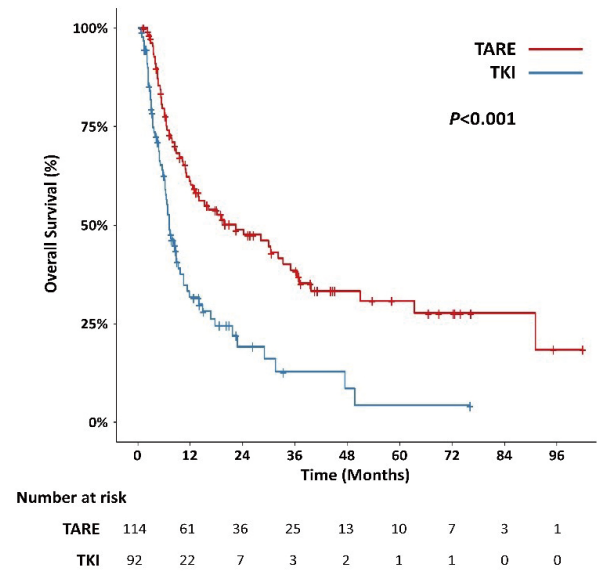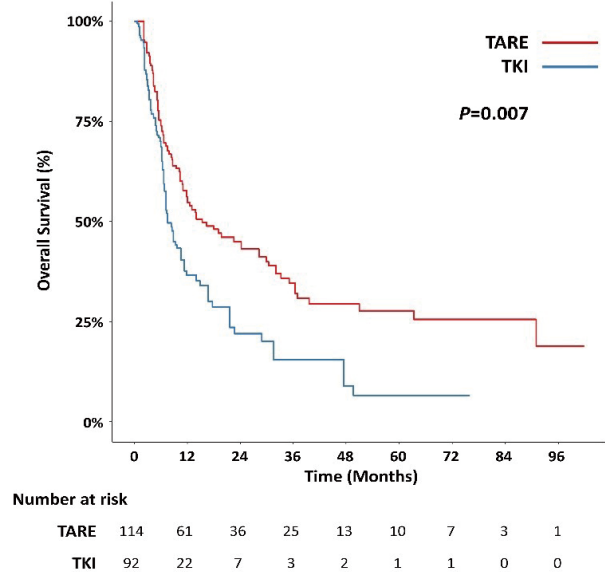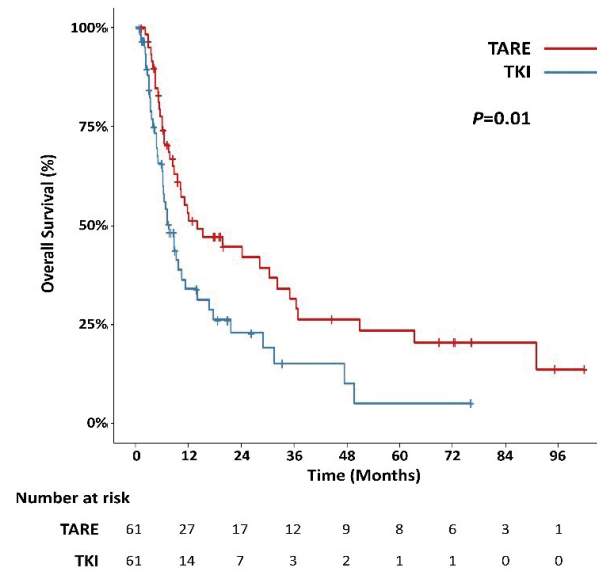

**Supplementary Figure 3.** Comparison of OS after excluding patients who received subsequent resection or RFA. After excluding 10 patients who underwent resection (n=8) or RFA (n=2) after TARE, OS was compared in an unmatched cohort (A) and balanced cohorts using IPTW (B) or PSM (C). No patients received subsequent resection or RFA in the TKI group. IPTW, inverse probability of treatment weighting; OS, overall survival; PSM, propensity score matching; RFA, radiofrequency ablation; TARE, transarterial radioembolization; TKI, tyrosine kinase inhibitor.
